# Supplementary material for: Multifunctional sulfate-assistant synthesis of seaweed-like N,S-doped carbons as high-performance anodes for K-ion capacitors
Source: Royal Society of Chemistry journal article supplement (doi:10.1039/d2ta01431a), 2022-01-01
Supplement: d2ta01431a1.pdf [file d2ta01431a1.pdf]

## Supporting Information

### **Multifunctional sulfate-assistant synthesis of seaweed-like N,S-doped carbons as high-performance anodes for K-ion capacitors**

Mengyue Liu,<sup>a</sup> Feng Zhu,<sup>b</sup> Weishan Cao,<sup>b</sup> Weihao Song,<sup>b</sup> Jiaxing Liu,<sup>b</sup> Xiangchao Feng,<sup>a</sup> Zhen Li,<sup>a</sup> Yingze Cao,<sup>a</sup> Pengfei Wang,<sup>a,\*</sup> Jin Niu<sup>b,\*</sup>

<sup>a</sup>Qian Xuesen Laboratory of Space Technology, China Academy of Space Technology, Beijing 100094, P. R. China

<sup>b</sup> State Key Laboratory of Chemical Resource Engineering, Laboratory of Electrochemical Process and Technology for materials, Beijing University of Chemical Technology, Beijing, 100029, P. R. China

\*Corresponding author.

E-mail: wangpengfei@qxslab.cn; niujin@mail.buct.edu.cn

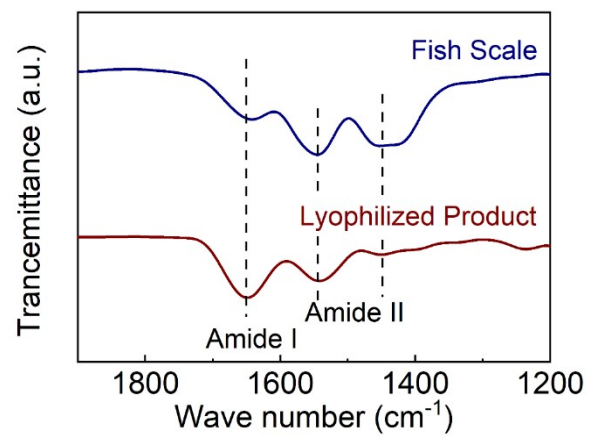

**Fig. S1** FTIR patterns of fish scale and lyophilized product after K<sub>2</sub>SO<sub>4</sub> solution extraction.

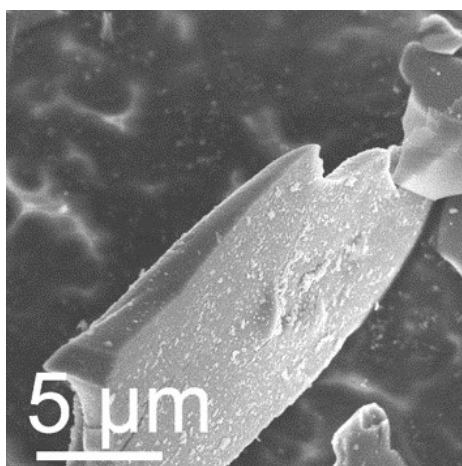

**Fig. S2** SEM images of NC700.

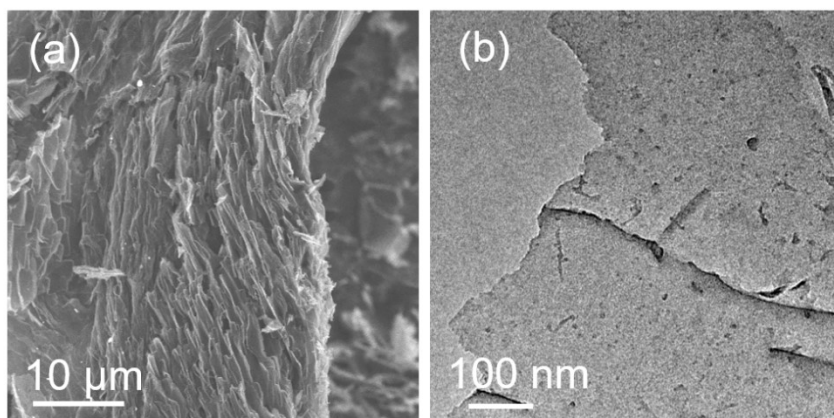

**Fig. S3** (a) SEM image and (b) TEM image of NSPC600.

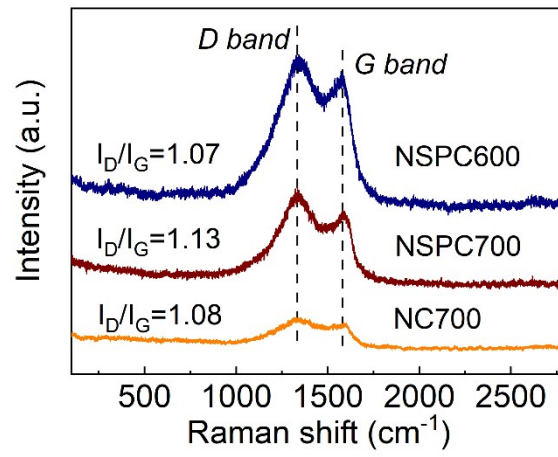

**Fig. S4** Raman spectra of NSPC600, NSPC700, and NC700.

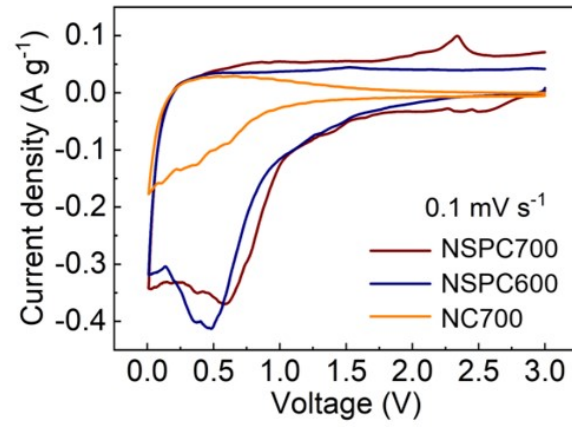

**Fig. S5** CV curves at the scan rate of 0.1 mV s<sup>-1</sup> of the NSPC700, NSPC600, and NC700 anodes in the first cycle.

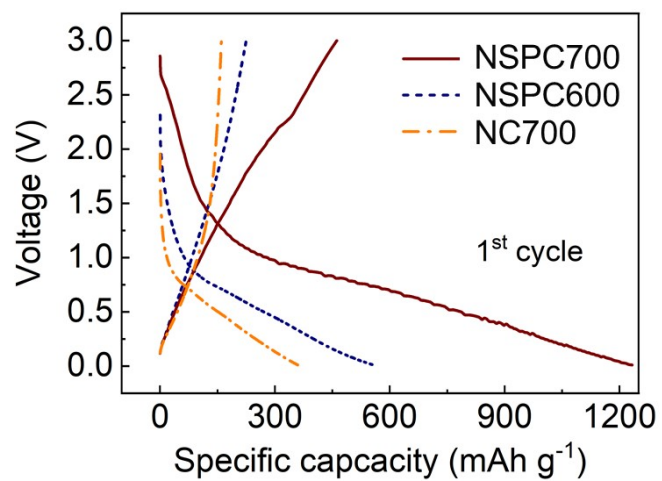

**Fig. S6** GCD curves of the NSPC700, NSPC600, and NC700 anodes in the first cycle at the current density of 0.05 A g<sup>-1</sup>.

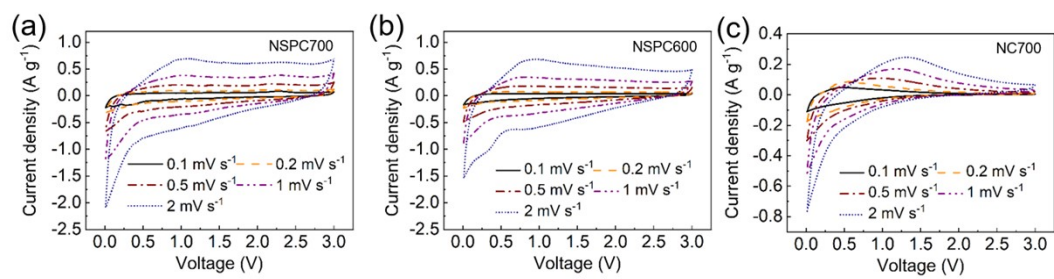

**Fig. S7** CV curves at various scan rates of the (a) NSPC700, (b) NSPC600, and (c) NC700 anodes.



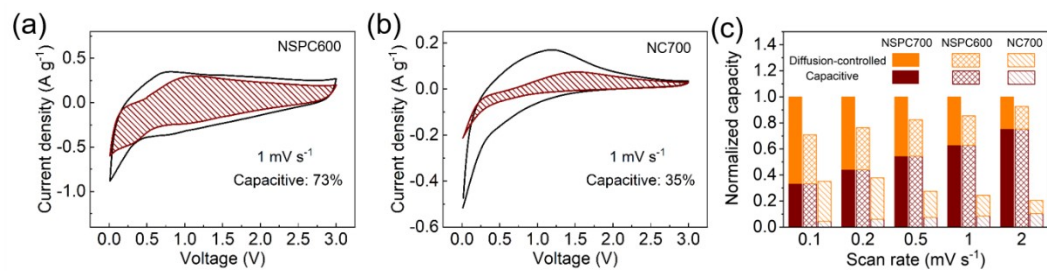

**Fig. S8** Storage contributions from the capacitive process and diffusion-controlled process of the (a) NSPC600 and (b) NC700 anodes at 1 mV s<sup>-1</sup>. (c) Normalized capacities of the NSPC600, NSPC700, and NC700 anodes derived from capacitive process and diffusion-controlled process at various scan rates.

**Table S1** Simulation results of the kinetic parameters for NSPC600, NSPC700, and NC700.

| Sample  | $R_e^a$ ( $\Omega$ ) | $R_f^b$ ( $\Omega$ ) | $R_{ct}^c$ ( $\Omega$ ) | $\sigma^d$ |
|---------|----------------------|----------------------|-------------------------|------------|
| NSPC600 | 5.767                | 15.61                | 2586                    | 458.15     |
| NSPC700 | 5.738                | 14.14                | 1532                    | 362.49     |
| NC700   | 8.483                | 54.23                | 8641                    | 2123.34    |

<sup>a</sup> The electrolyte resistance

<sup>b</sup> The resistance of the SEI

<sup>c</sup> The charge-transfer resistance

<sup>d</sup> Warburg coefficient

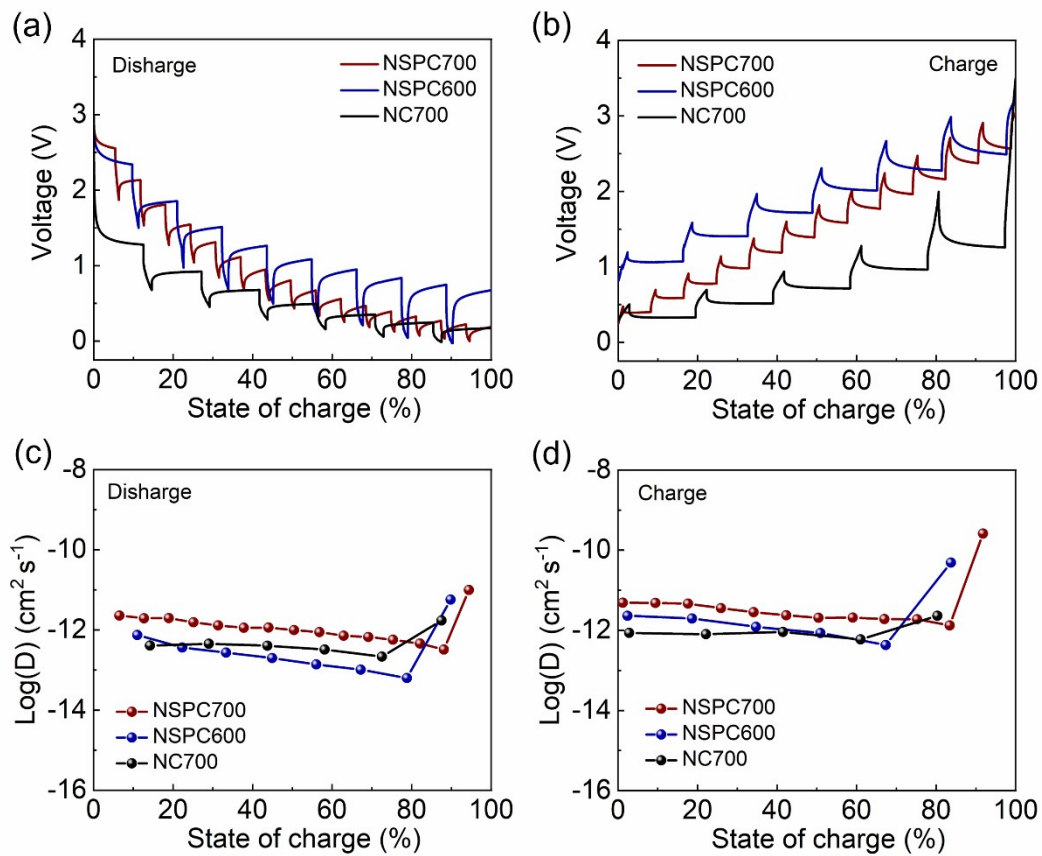

**Fig. S9** GITT potential plots of the anodes in the (a) potassiation and (b) depotassiation processes. The  $K^+$  diffusion coefficients of the anodes in the (c) potassiation and (d) depotassiation processes.

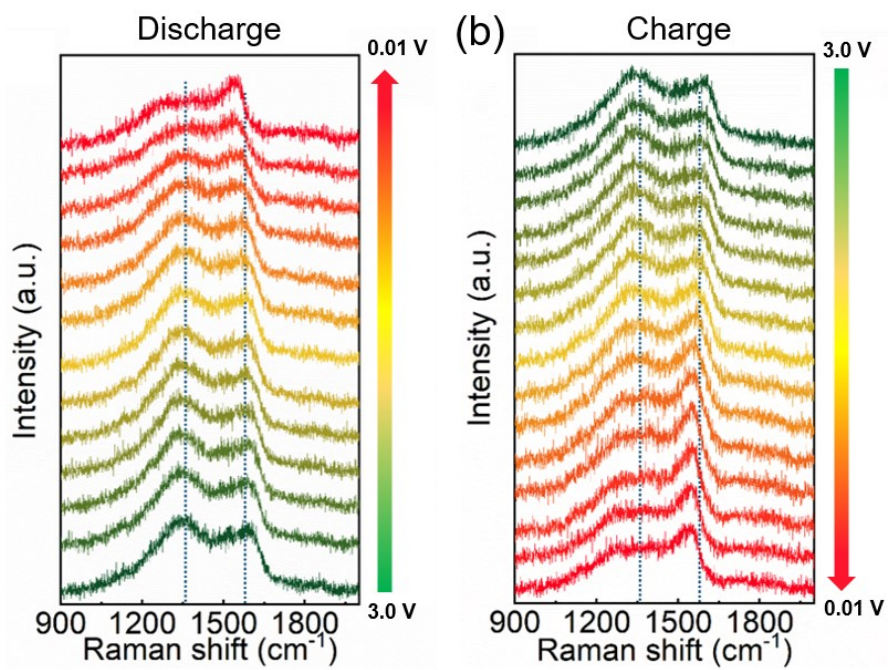

**Fig. S10** *In-situ* Raman spectra of the NSPC700 anode during the discharge/charge processes.

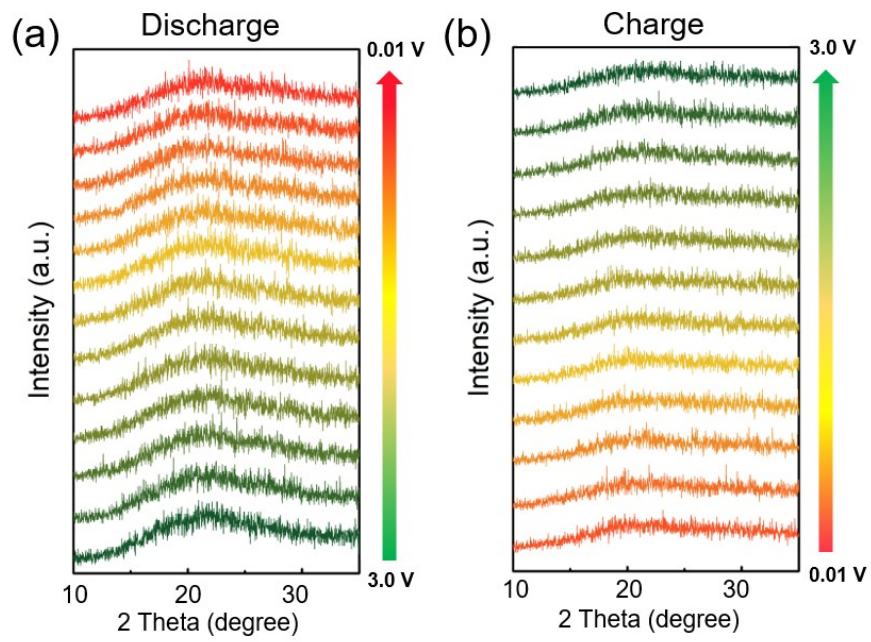

**Fig. S11** *In-situ* XRD patterns of the NSPC700 anode during the discharge/charge processes.

**Table S2** The near-surface N species of NSPC700 anode after discharge and charge processes.

|                 | N-Q   | N-5    | N-6    | N-Q-K  | N-5-K  | N-6-K  |
|-----------------|-------|--------|--------|--------|--------|--------|
| After discharge | -     | -      | -      | 37.03% | 24.25% | 38.73% |
| After charge    | 9.74% | 12.06% | 16.35% | 14.47% | 12.72% | 34.67% |

**Table S3** The near-surface S species of NSPC700 anode after discharge and charge processes.

|                 | C-SO <sub>x</sub> -C | C-S-C  | -K <sub>2</sub> S <sub>x</sub> |
|-----------------|----------------------|--------|--------------------------------|
| After discharge | 14.19%               | 8.44%  | 77.37%                         |
| After charge    | 15.65%               | 21.23% | 63.12%                         |

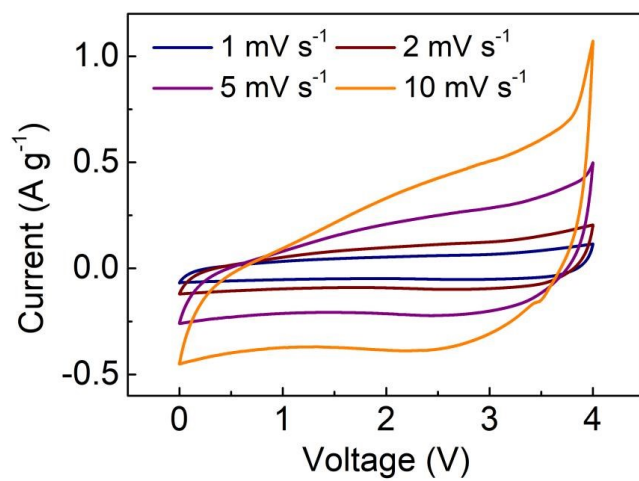

**Fig. S12** CV curves of the NSPC700||HPC800 KIC at different scan rates.



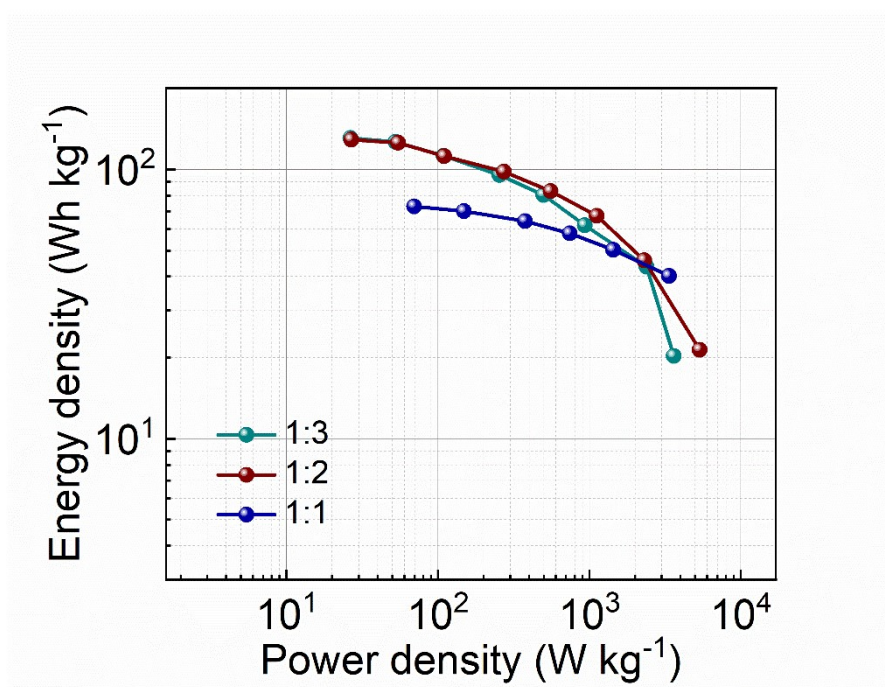

**Fig. S13** Ragone plots of the NSPC700||HPC800 KICs with different mass ratio of anode to cathode materials.
